# Supplementary material
Source: publisher site journal article supplement (https://www.dovepress.com/article/375981)
Supplement: Supplementary file 1 [file get_supplementary_file.php]

REVIEW

Francisco Llorca-Colomer et al

**DIFFERENCES IN CLASSIFICATION STANDARDS FOR THE PREVALENCE OF OVERWEIGHT AND OBESITY IN CHILDREN. A SYSTEMATIC REVIEW AND META-ANALYSIS.**

**SUPPLEMENTARY MATERIAL. SEARCH STRATEGY**

**Pubmed Search strategy:**

Body Mass Index/

Overweight/

Obesity/

Childern/

Reference Standars/

(Body Mass Index* AND Overweight* AND Obesity* AND Childern* AND Reference Standars*)

("body mass index"[MeSH Terms] OR ("body"[All Fields] AND "mass"[All Fields] AND "index"[All Fields]) OR "body mass index"[All Fields]) AND ("overweight"[MeSH Terms] OR "overweight"[All Fields] OR "overweighted"[All Fields] OR "overweightness"[All Fields] OR "overweights"[All Fields]) AND ("obeses"[All Fields] OR "obesity"[MeSH Terms] OR "obesity"[All Fields] OR "obese"[All Fields] OR "obesities"[All Fields] OR "obesity s"[All Fields]) AND "Childern"[All Fields] AND (("refer"[All Fields] OR "referal"[All Fields] OR "referals"[All Fields] OR "refered"[All Fields] OR "reference"[All Fields] OR "references"[All Fields] OR "referral and consultation"[MeSH Terms] OR ("referral"[All Fields] AND "consultation"[All Fields]) OR "referral and consultation"[All Fields] OR "referred"[All Fields] OR "referring"[All Fields] OR "refers"[All Fields]) AND "Standars"[All Fields]) AND 2010/01/01:2021/12/31[Date - Publication]

**WOS Search strategy:**

Body Mass Index/

Overweight/

Obesity/

Childern/

Reference Standars/

(Body Mass Index* AND Overweight* AND Obesity* AND Childern* AND Reference Standars*)

((((TS=(Body Mass Index)) AND TS=(Overweight)) AND TS=(Obesity)) AND TS=(children)) AND TS=(Reference standard)

# Database: All Databases

# Entitlements:

- WOS: 2010 to 2021

- CCC: 2010 to 2021

- KJD: 2010 to 2021

- MEDLINE: 2010 to 2021

- SCIELO: 2010 to 2021

# Searches:

((((TS=(Body Mass Index)) AND TS=(Overweight)) AND TS=(Obesity)) AND TS=(children)) AND TS=(Reference standard)

Timespan: 2010 to 2021 Results: 463
